# Supplementary material for: Prioritization of New Candidate Genes for Rare Genetic Diseases by a Disease-Aware Evaluation of Heterogeneous Molecular Networks
Source: MDPI journal article supplement (doi:10.3390/ijms24021661), 2023-01-14
Supplement: s1 [file s1]

## ***Supplementary Information***

### **Prioritization of new candidate genes for rare genetic diseases by a disease-aware evaluation of heterogeneous molecular networks**

Lorena de la Fuente<sup>1,2,3</sup>, Marta Del Pozo-Valero<sup>1,2</sup>, Irene Perea-Romero<sup>1,2</sup>, Fiona Blanco-Kelly<sup>1,2</sup>, Lidia Fernández-Caballero<sup>1,2</sup>, Marta Cortón<sup>1,2</sup>, Carmen Ayuso<sup>1,2</sup>, Pablo Mínguez<sup>1,2,3#</sup>

<sup>1</sup>Department of Genetics, Health Research Institute–Fundación Jiménez Díaz University Hospital, Universidad Autónoma de Madrid (IIS-FJD, UAM), 28049 Madrid, Spain

<sup>2</sup>Center for Biomedical Network Research on Rare Diseases (CIBERER), Instituto de Salud Carlos III (ISCIII), 28040 Madrid, Spain

<sup>3</sup>Bioinformatics Unit, Health Research Institute–Fundación Jiménez Díaz University Hospital, Universidad Autónoma de Madrid (IIS-FJD, UAM), 28049 Madrid, Spain

**#Corresponding author: Pablo Mínguez ([pablo.minguez@quironsalud.es](mailto:pablo.minguez@quironsalud.es))**

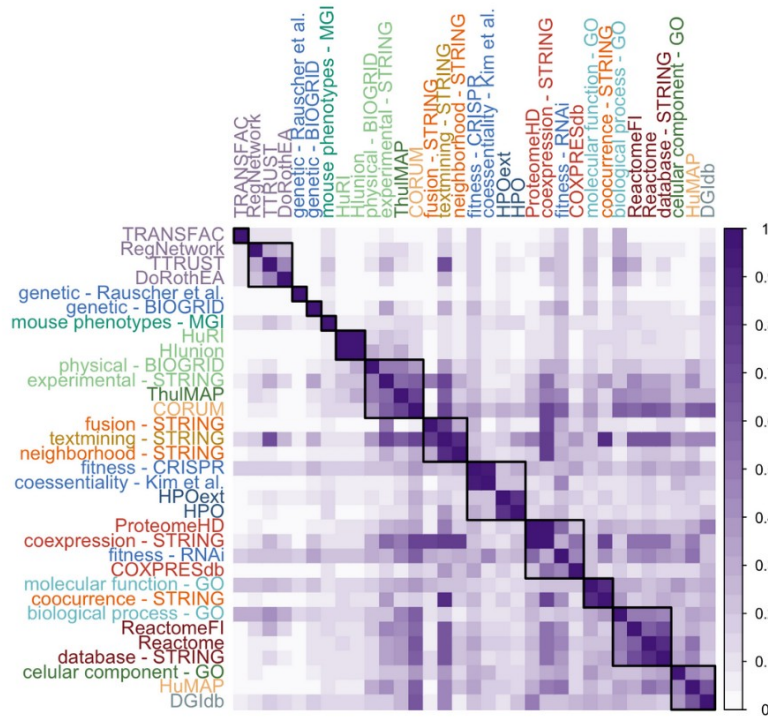

#### Knowledge categories

- Cocitation (gene cocitation in scientific papers)
- Coessentiality (as genetic interactions)
- Coexpression
- Colocalization (in cell organelles)
- Complexes (protein complexes)
- Drug sharing (targets drug sharing)
- Functional annotations (shared gene functional annotations)
- Genomic localization (features from genomic localization over evolution)
- Mouse models (shared phenotypic annotations from mouse models)
- Pathways (participation in molecular pathways)
- Phenotype (shared human gene phenotypes)
- PPIs (protein-protein interactions)
- Regulation (gene regulation)

**Figure S1. Pairwise network similarity.** Edge-wise overlap coefficient is represented for each pair of networks considered in this study. Labels are colored according to the Knowledge Category (KC) in which they are classified. Hierarchical clustering of networks highlights their association by KC and reveals some networks with a global low overlap coefficient as genetic interactions from BIOGRID and, oppositely, shows networks with general high overlap such as textmining from STRING.

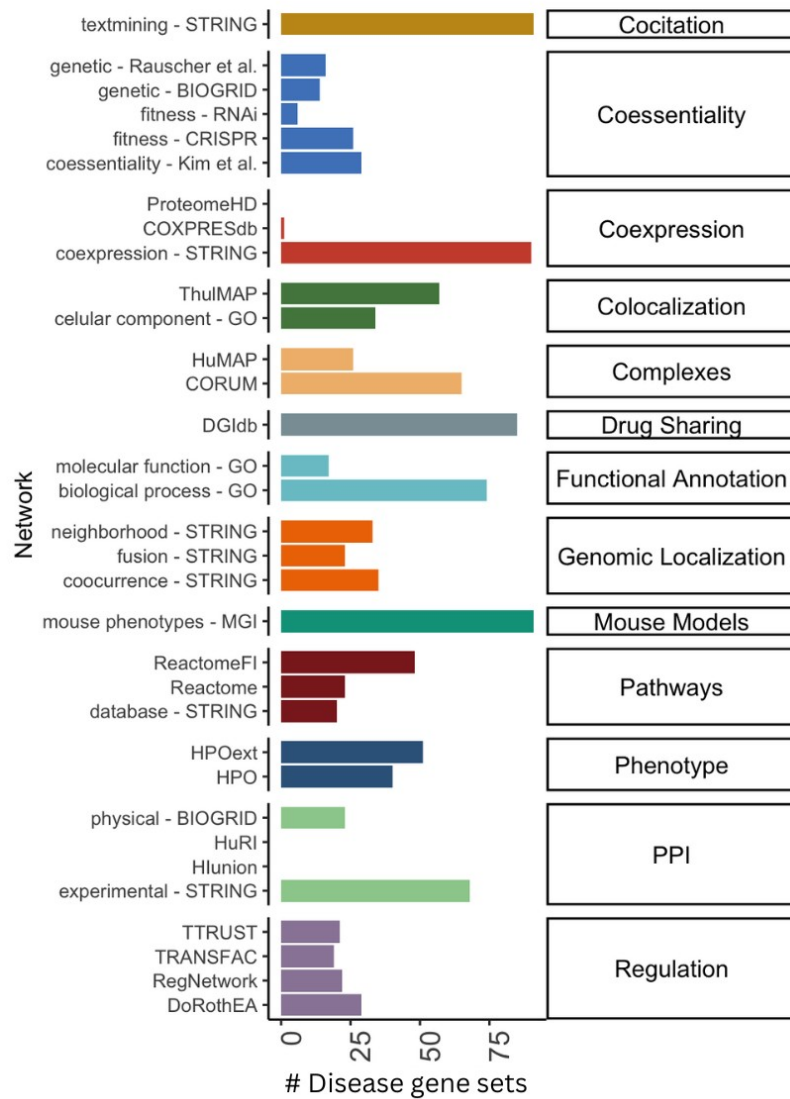

**Figure S2: Representative KC network across diseases.** For every tested disease gene set (N=91) and knowledge category (KC, N=13), we selected a single individual network based on their ability to prioritize disease genes by using their area under the precision-recall gain (AUPRG) as measure of non-random behaviour. A total of 91 disease genesets were evaluated.

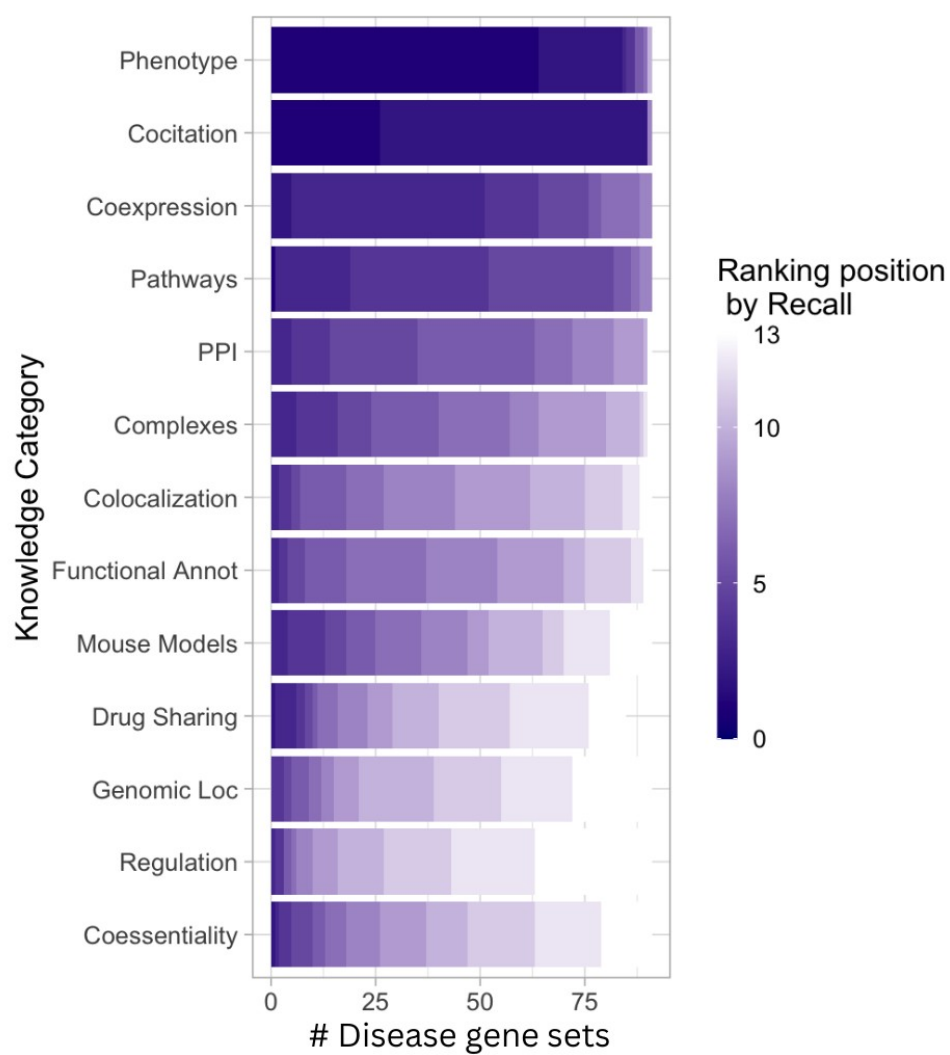

**Figure S3: Ranking of KC networks by efficiency in their recovery of gene-disease associations.**  
Recall at  $n$  ( $n$  = gene set size) was used as efficiency metric.

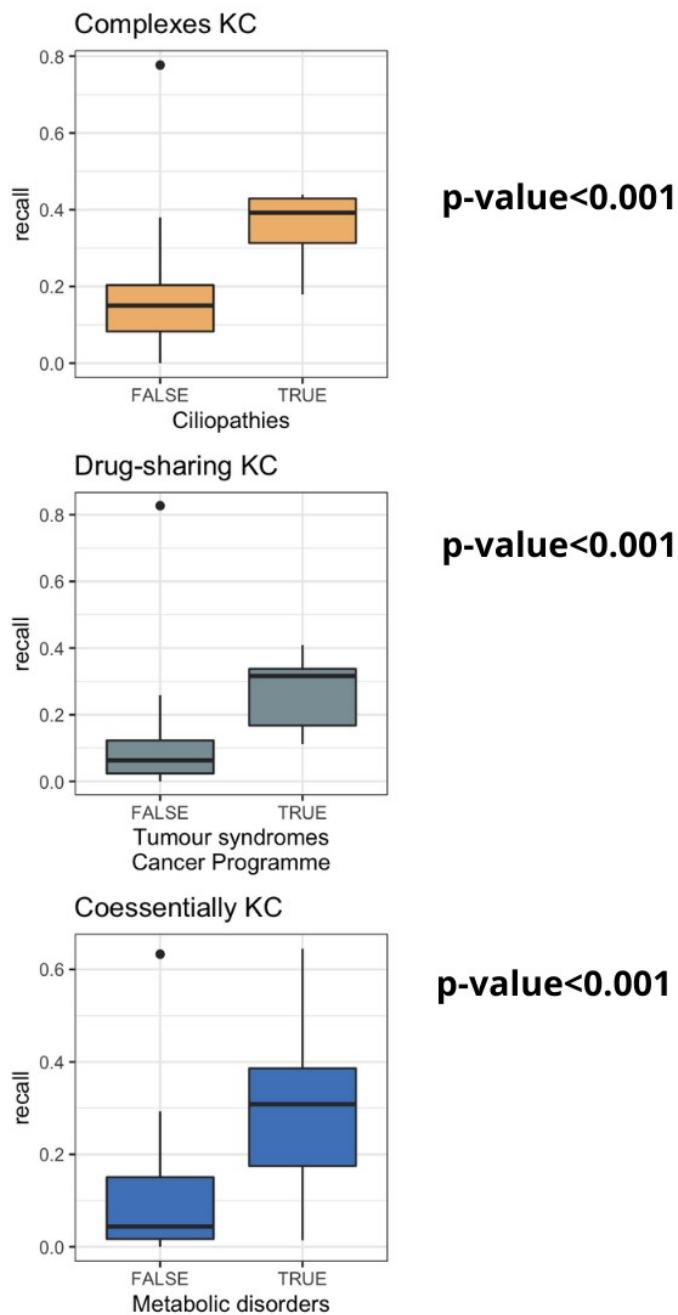

**Figure S4: High efficiency of particular KCs in specific disease families.** Recall at n-top (n = gene set size) for specific KCs are represented as a distribution classified by: TRUE (diseases of that family) and FALSE (other diseases). Increased efficiency for the disease family under study was tested using the Wilcoxon signed-rank test.

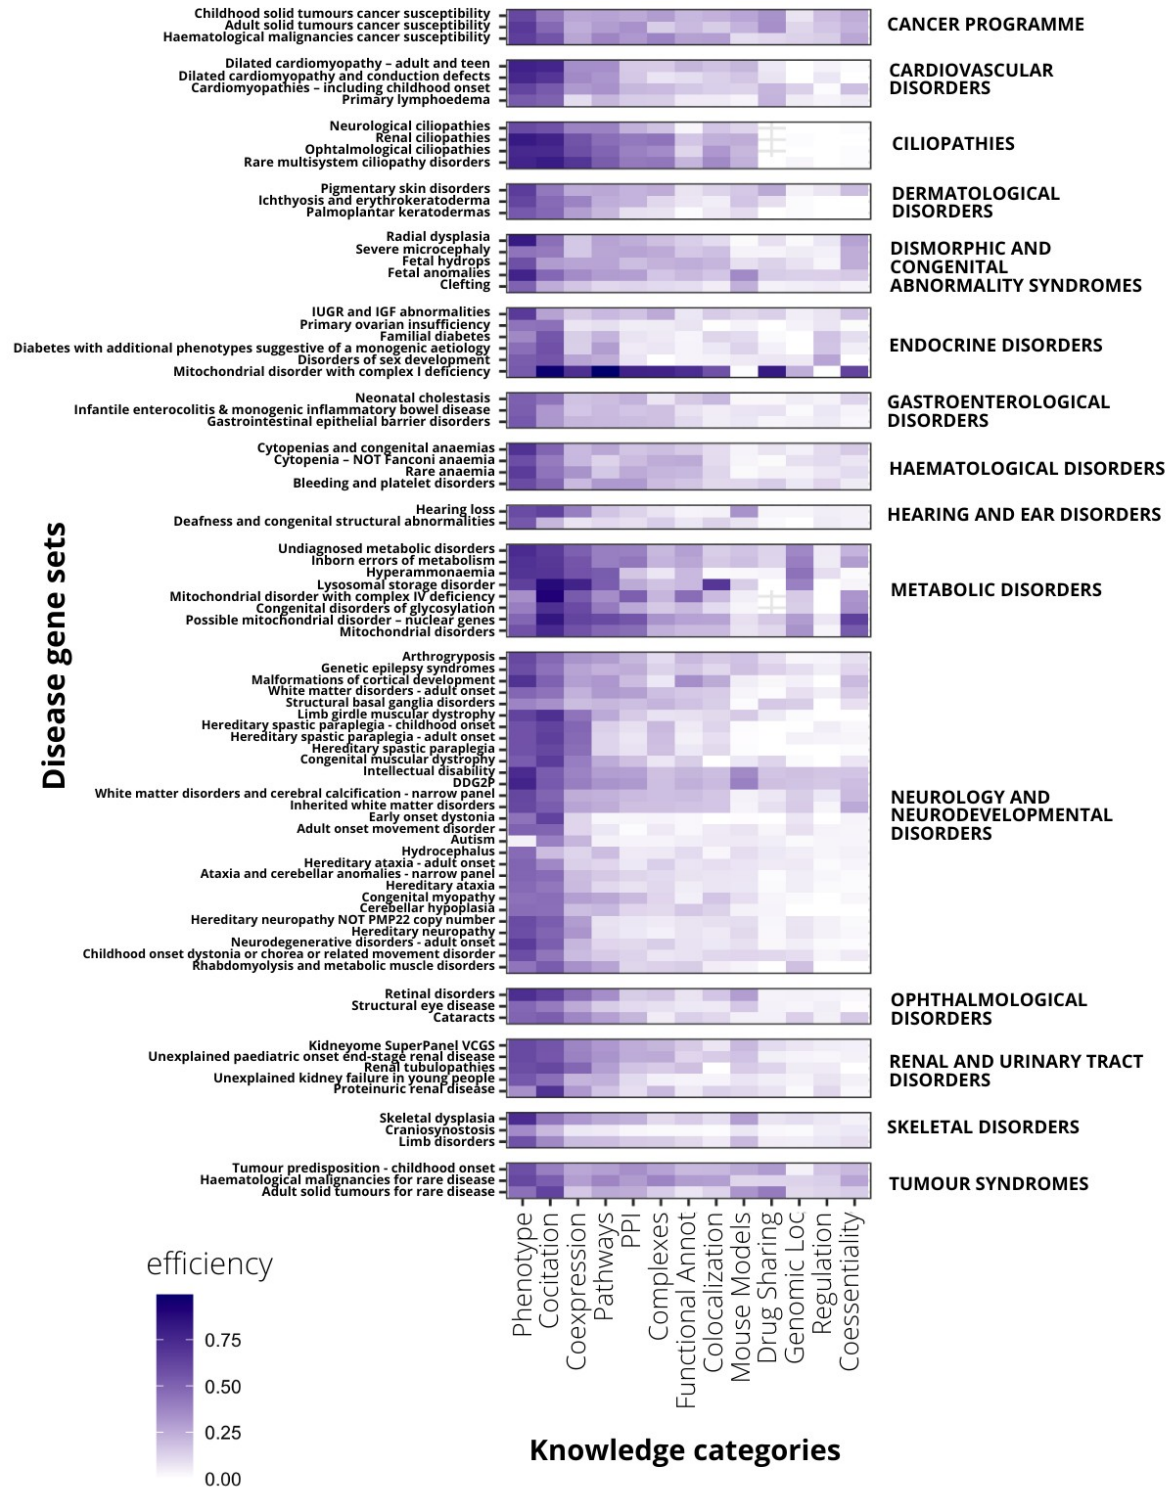

**Figure S5. Efficiency in gene recovery for every Knowledge Category (KC) in 91 diseases.** Efficiency is measured as recall at n-top (n=number of genes associated to the disease). Diseases are classified in disease families.



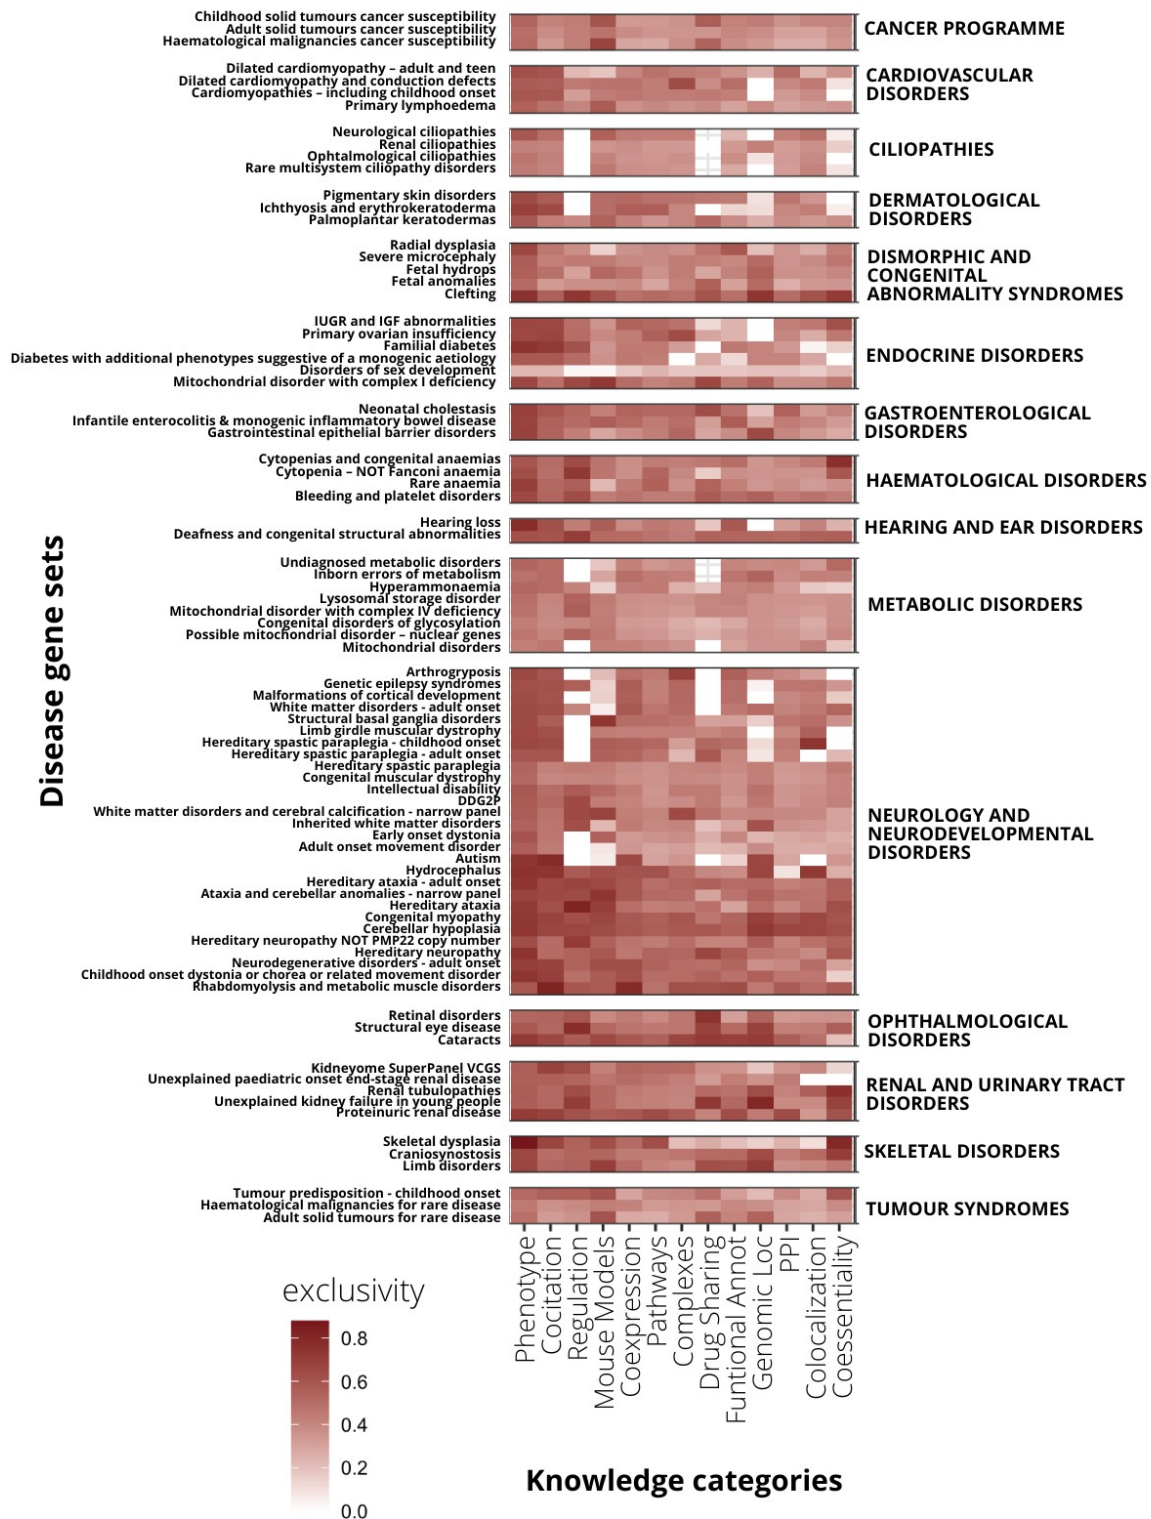

**Figure S6. Exclusivity in gene recovery for every Knowledge Category (KC) in 91 diseases.** Exclusivity is measured as the average of gene specificity at n-top (n=number of genes associated to the disease). Diseases are classified in disease families.





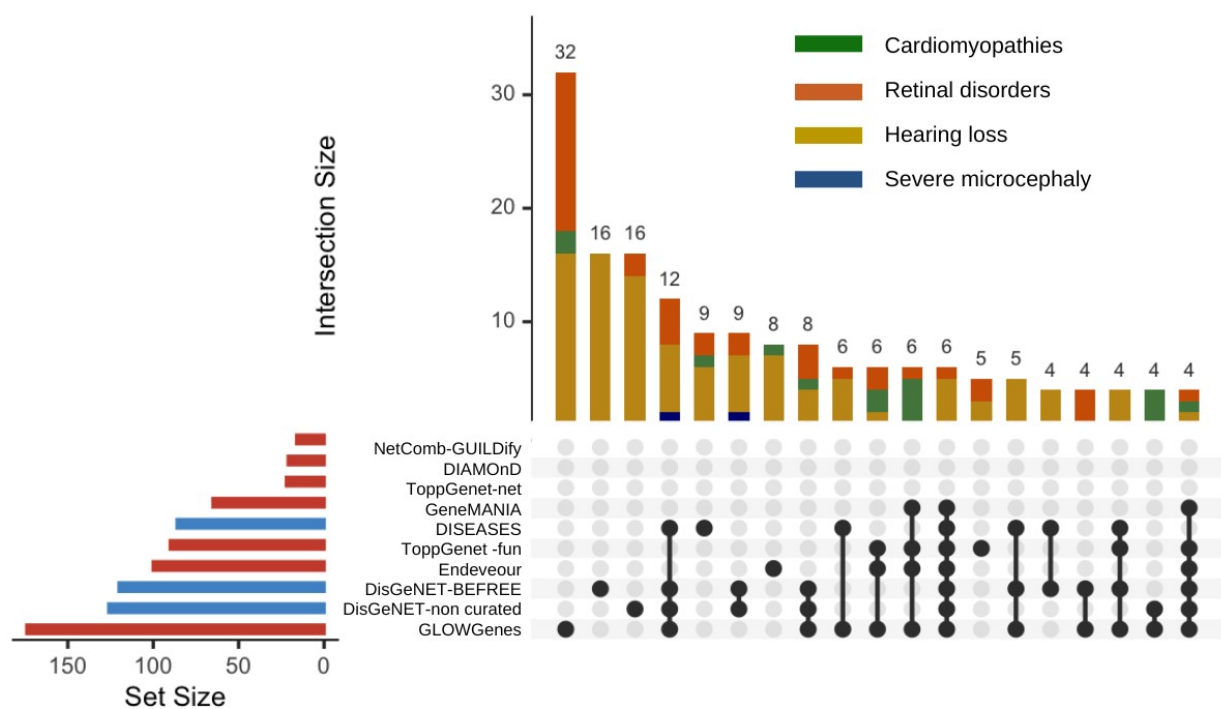

**Figure S9. Ranking of methods for prediction of gene-disease associations recovering genes from four diseases.** Number and overlap of genes captured by each of the methods evaluated at top-n (n = size of RG validation set). Diseases included are: cardiomyopathies including childhood onset, hearing loss, retinal disorders and severe microcephaly.

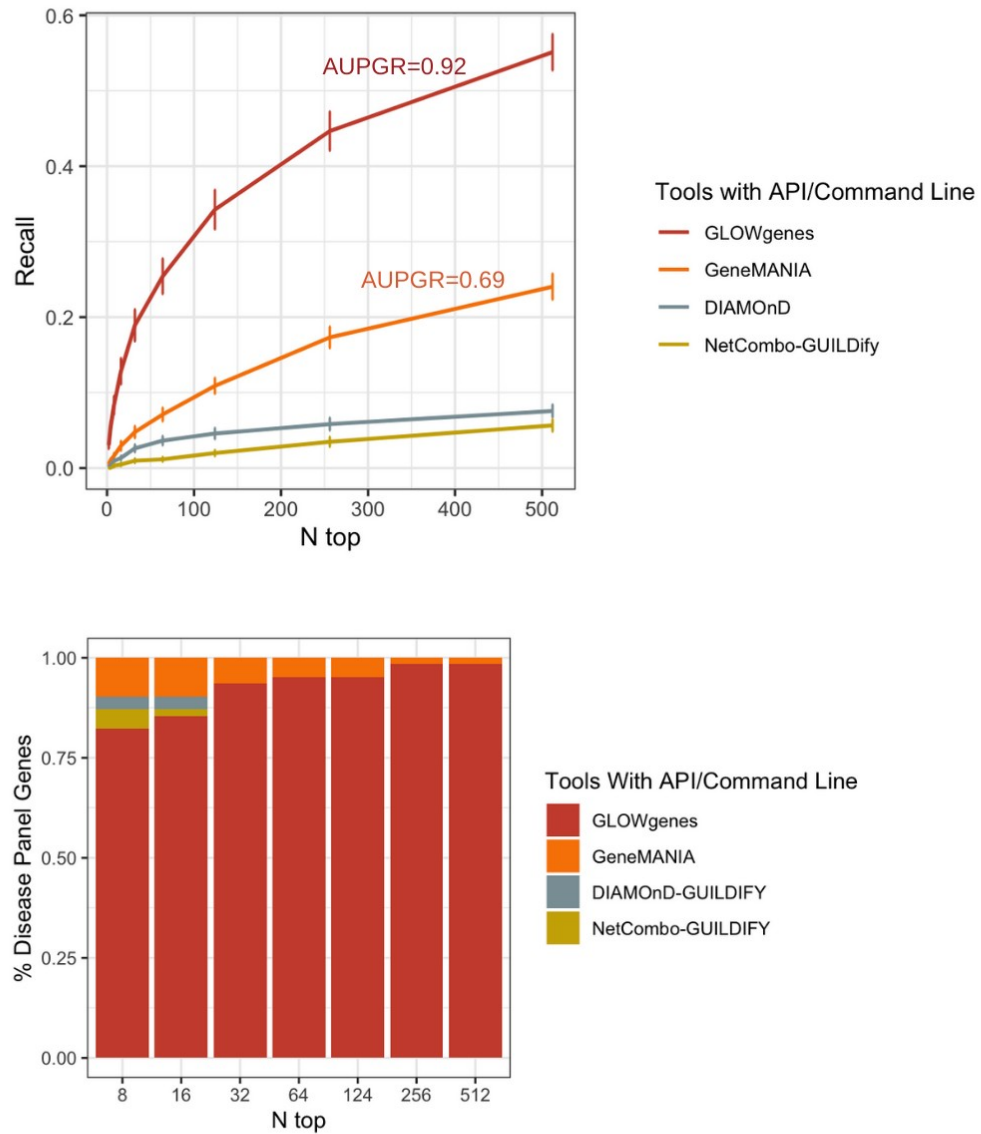

**Figure S10.** Performance ranking of gene-disease association prediction methods providing programmatic access across 70 PanelApp disease gene sets. Recall at top-n (n = size of RG validation set) was selected as threshold.

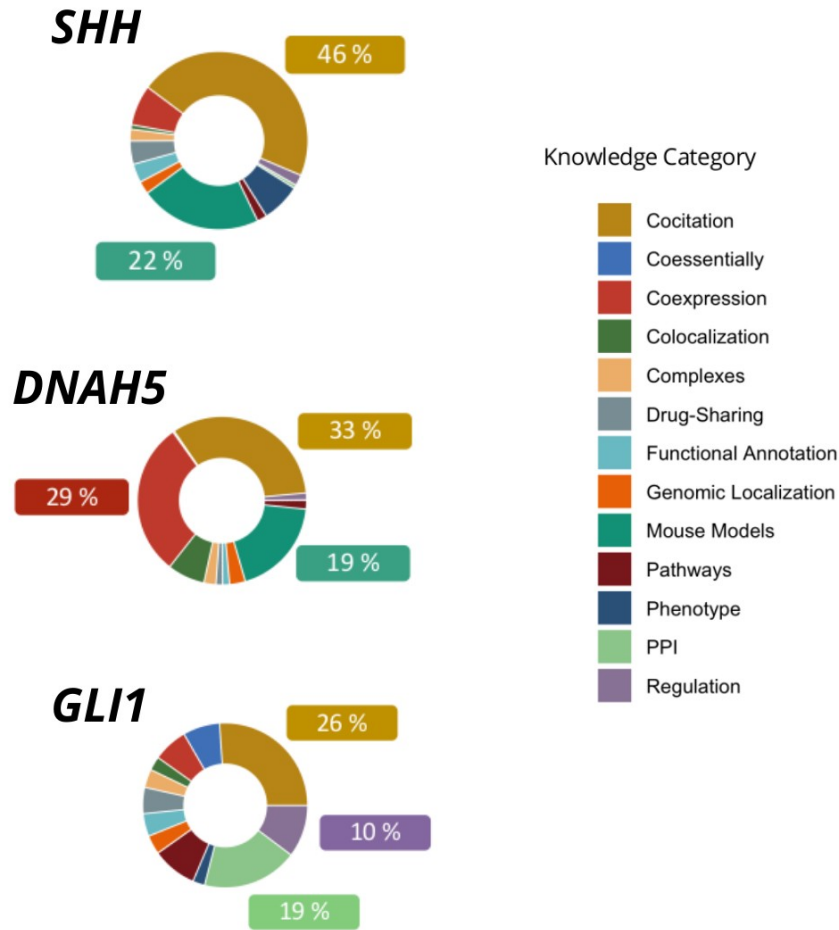

**Figure S11.** KC contribution in the prediction of three genes (*SHH*, *DNAH5* and *GLI1*) in their association of syndromic inherited retinal dystrophies. Pathogenic variants were found in this three genes in three patients.

**Table S1.** List of sources with functional information used in this study.

| <b>Network</b>                     | <b>Knowledge Category</b> | <b>Edges weights</b>             | <b>Data Source</b>                                   | <b>Download Source</b>                                                                                                                                                                                                                                      | <b>Reference</b> |
|------------------------------------|---------------------------|----------------------------------|------------------------------------------------------|-------------------------------------------------------------------------------------------------------------------------------------------------------------------------------------------------------------------------------------------------------------|------------------|
| Textmining - STRING                | COCITATION                | Textmining score                 | STRING v11                                           | <a href="https://string-db.org/cgi/download.pl">https://string-db.org/cgi/download.pl</a>                                                                                                                                                                   | [18]             |
| COXPRESdb                          | COEXPRESSION              | Inverse of the Mutual Rank value | COXPRESdb v7 - Hsa-u.c2-0                            | <a href="https://coexpresdb.jp/download/Hsa-u.c2-0/">https://coexpresdb.jp/download/Hsa-u.c2-0/</a>                                                                                                                                                         | [19]             |
| Coexpression - STRING              | COEXPRESSION              | Coexpression channel score       | STRING v11                                           | <a href="https://string-db.org/cgi/download.pl">https://string-db.org/cgi/download.pl</a>                                                                                                                                                                   | [18]             |
| Coregulation map                   | COEXPRESSION              |                                  | ProteomeHD - top-scoring 0.5%                        | <a href="https://www.proteomehd.net/download">https://www.proteomehd.net/download</a>                                                                                                                                                                       | [24]             |
| Experimental subcellular map       | COLOCALIZATION            |                                  | Subcellular Localization Experimental Map            | <a href="http://science.sciencemag.org/highwire/filestream/694217/field_highwire_adjunct_files/9/aal3321_Thul_SM_table_S17.xlsx">http://science.sciencemag.org/highwire/filestream/694217/field_highwire_adjunct_files/9/aal3321_Thul_SM_table_S17.xlsx</a> | [23]             |
| Cellular Component similarity - GO | COLOCALIZATION            | Semantic similarity scores       | Gene Ontology CC ontology                            | <a href="http://geneontology.org/docs/download-ontology/">http://geneontology.org/docs/download-ontology/</a>                                                                                                                                               | [37, 38]         |
| Experimental - STRING              | PPI                       |                                  | STRING v11 - experimental channel                    | <a href="https://string-db.org/cgi/download.pl">https://string-db.org/cgi/download.pl</a>                                                                                                                                                                   | [18]             |
| Physical PPI - BIOGRID             | PPI                       |                                  | BIOGRID 4.2                                          | <a href="https://downloads.thebiogrid.org/BioGRID">https://downloads.thebiogrid.org/BioGRID</a>                                                                                                                                                             | [25]             |
| HuRI physical PPI                  | PPI                       |                                  | The Human Reference Interactome                      | <a href="http://www.interactome-atlas.org/">http://www.interactome-atlas.org/</a>                                                                                                                                                                           | [26]             |
| HI-union physical PPI              | PPI                       |                                  | The Human Reference Interactome                      | <a href="http://www.interactome-atlas.org/">http://www.interactome-atlas.org/</a>                                                                                                                                                                           | [26]             |
| Reactome pathways                  | PATHWAYS                  |                                  | Reactome                                             | <a href="https://reactome.org/download-data">https://reactome.org/download-data</a>                                                                                                                                                                         | [39]             |
| Reactome FI                        | PATHWAYS                  |                                  | Pathway-based functional interaction network - v2018 | <a href="https://reactome.org/about/news/133-reactomefiviz-app-version-7-2-0-released">https://reactome.org/about/news/133-reactomefiviz-app-version-7-2-0-released</a>                                                                                     | [28]             |
| Database - STRING                  | PATHWAYS                  |                                  | STRING v11 - database channel                        | <a href="https://string-db.org/cgi/download.pl">https://string-db.org/cgi/download.pl</a>                                                                                                                                                                   | [18]             |
| Molecular function similarity      | FUNCTIONAL ANNOTATION     | Semantic similarity scores       | Gene Ontology MF ontology                            | <a href="http://geneontology.org/docs/download-ontology/">http://geneontology.org/docs/download-ontology/</a>                                                                                                                                               | [37, 38]         |
| Biological process similarity      | FUNCTIONAL ANNOTATION     | Semantic similarity scores       | Gene Ontology BP ontology                            | <a href="http://geneontology.org/docs/download-ontology/">http://geneontology.org/docs/download-ontology/</a>                                                                                                                                               | [37, 38]         |
| hu.MAP co-complex                  | COMPLEXES                 |                                  | hu.MAP Experimental Map                              | <a href="http://hu.proteincomplexes.org/download">http://hu.proteincomplexes.org/download</a>                                                                                                                                                               | [31]             |
| CORUM co-complex                   | COMPLEXES                 |                                  | CORUM                                                | <a href="http://mips.helmholtz-muenchen.de/corum/">http://mips.helmholtz-muenchen.de/corum/</a>                                                                                                                                                             | [36]             |

|                             |                      |                                                                              |                                                                               |                                                                                                                                                                                                                          |      |
|-----------------------------|----------------------|------------------------------------------------------------------------------|-------------------------------------------------------------------------------|--------------------------------------------------------------------------------------------------------------------------------------------------------------------------------------------------------------------------|------|
|                             |                      |                                                                              |                                                                               | <a href="#">download/coreComplexes.txt.zip</a>                                                                                                                                                                           |      |
| Genetic - Rauscher et al.   | COESSENTIALITY       |                                                                              | Genetic Interaction Network from 85 CRISPR/Cas9 screens in human cancer cells | <a href="https://www.embopress.org/doi/full/10.15252/msb.20177656">https://www.embopress.org/doi/full/10.15252/msb.20177656</a>                                                                                          | [27] |
| Coessentiality - Kim et al. | COESSENTIALITY       | weighted co-essentiality                                                     | 276 high-quality CRISPR knockout screens in cancer cell lines                 | <a href="https://www.ncbi.nlm.nih.gov/pmc/articles/PMC6464042/bin/LSA-2018-00278_TableS5.txt">https://www.ncbi.nlm.nih.gov/pmc/articles/PMC6464042/bin/LSA-2018-00278_TableS5.txt</a>                                    | [29] |
| Fitness RNAi                | COESSENTIALITY       | gene fitness rank correlation coefficients                                   | 501 cancer cell lines – RNAi - Achilles Project                               | Reproduced following Pan et al. 2018 - <a href="https://figshare.com/articles/dataset/Pan_Meyers_et_al_Cell_Systems_2018_/6005297">https://figshare.com/articles/dataset/Pan_Meyers_et_al_Cell_Systems_2018_/6005297</a> | [35] |
| Fitness CRISPR              | COESSENTIALITY       |                                                                              | 342 cancer cell lines – CRISPR-Cas - Achilles Project                         | Reproduced following Pan et al. 2018 - <a href="https://figshare.com/articles/dataset/Pan_Meyers_et_al_Cell_Systems_2018_/6005297">https://figshare.com/articles/dataset/Pan_Meyers_et_al_Cell_Systems_2018_/6005297</a> | [35] |
| Genetic - BIOGRID           | COESSENTIALITY       |                                                                              | BIOGRID 4.2                                                                   | <a href="https://downloads.thebiogrid.org/BioGRID">https://downloads.thebiogrid.org/BioGRID</a>                                                                                                                          | [25] |
| DoRothEA regulation         | REGULATION           | evidence levels transformed into numeric values and normalized to 0-1 range. | DOROTHEA                                                                      | <a href="https://saezlab.github.io/DoRothEA">saezlab.github.io/DoRothEA</a>                                                                                                                                              | [21] |
| TRANSFAC regulation         | REGULATION           |                                                                              | TRANSFAC                                                                      | NDEX                                                                                                                                                                                                                     | [22] |
| TTRUST regulation           | REGULATION           |                                                                              | TTRUSTv2                                                                      | <a href="https://www.gmpedia.org/trrust/">https://www.gmpedia.org/trrust/</a>                                                                                                                                            | [20] |
| RegNetwork                  | REGULATION           |                                                                              | RegNetwork                                                                    | <a href="http://www.regnetworkweb.org/">http://www.regnetworkweb.org/</a>                                                                                                                                                | [30] |
| HPO similarity              | PHENOTYPE            | Z-scores in the distribution of Jaccard values                               | HPO similarity                                                                | <a href="https://hpo.jax.org/app/download/annotation">https://hpo.jax.org/app/download/annotation</a>                                                                                                                    | [32] |
| Extended HPO similarity     | PHENOTYPE            | Z-scores in the distribution of Jaccard values                               | HPO similarity                                                                | <a href="https://hpo.jax.org/app/download/annotation">https://hpo.jax.org/app/download/annotation</a>                                                                                                                    | [32] |
| Phenotype - MGI             | MOUSE MODELS         | Z-scores in the distribution of Jaccard values                               | MGIphenotype similarity                                                       | <a href="http://www.informatics.jax.org/downloads/reports/index.html">http://www.informatics.jax.org/downloads/reports/index.html</a>                                                                                    | [33] |
| DGIdb similarity            | DRUG SHARING         |                                                                              | DGIdb Drug-Gene interactions                                                  | <a href="http://www.dgldb.org/downloads">http://www.dgldb.org/downloads</a>                                                                                                                                              | [34] |
| Neighborhood - STRING       | GENOMIC LOCALIZATION |                                                                              | STRING v11-neighborhood channel                                               | <a href="https://string-db.org/cgi/download.pl">https://string-db.org/cgi/download.pl</a>                                                                                                                                | [18] |
| Cooccurrence - STRING       | GENOMIC              |                                                                              | STRING v11-                                                                   | <a href="https://string-db.org/cgi/">https://string-db.org/cgi/</a>                                                                                                                                                      | [18] |

|                 |                         |  |                               |                                                                                                |      |
|-----------------|-------------------------|--|-------------------------------|------------------------------------------------------------------------------------------------|------|
|                 | LOCALIZATION            |  | cooccurrence channel          | <a href="#">download.pl</a>                                                                    |      |
| Fusion - STRING | GENOMIC<br>LOCALIZATION |  | STRING v11- fusion<br>channel | <a href="https://string-db.org/cgi/download.pl">https://string-db.org/cgi/<br/>download.pl</a> | [18] |

**Table S2.** List of 91 gene sets from the PanelApp resource used to diagnose genetic diseases. Families taken from level 2 in PanelApp classification.

| PanelApp disease                                  | Disease family                                  | Number of genes |
|---------------------------------------------------|-------------------------------------------------|-----------------|
| Childhood solid tumours cancer susceptibility     | Cancer programme                                | 82              |
| Adult solid tumours cancer susceptibility         | Cancer programme                                | 100             |
| Haematological malignancies cancer susceptibility | Cancer programme                                | 92              |
| Dilated cardiomyopathy – adult and teen           | Cardiovascular disorders                        | 46              |
| Dilated cardiomyopathy and conduction defects     | Cardiovascular disorders                        | 46              |
| Cardiomyopathies – including childhood onset      | Cardiovascular disorders                        | 46              |
| Primary lymphoedema                               | Cardiovascular disorders                        | 42              |
| Neurological ciliopathies                         | Ciliopathies                                    | 47              |
| Renal ciliopathies                                | Ciliopathies                                    | 76              |
| Ophtalmological ciliopathies                      | Ciliopathies                                    | 61              |
| Rare multisystem ciliopathy disorders             | Ciliopathies                                    | 99              |
| Pigmentary skin disorders                         | Dermatological disorders                        | 107             |
| Ichthyosis and erythrokeratoderma                 | Dermatological disorders                        | 54              |
| Palmoplantar keratodermas                         | Dermatological disorders                        | 63              |
| Radial dysplasia                                  | Dysmorphic and congenital abnormality syndromes | 53              |
| Severe microcephaly                               | Dysmorphic and congenital abnormality syndromes | 106             |
| Fetal hydrops                                     | Dysmorphic and congenital abnormality syndromes | 55              |
| Fetal anomalies                                   | Dysmorphic and congenital abnormality syndromes | 1326            |
| Clefting                                          | Dysmorphic and congenital abnormality syndromes | 188             |
| IUGR and IGF abnormalities                        | Endocrine disorders                             | 96              |
| Primary ovarian insufficiency                     | Endocrine disorders                             | 43              |

|                                                                         |                                            |     |
|-------------------------------------------------------------------------|--------------------------------------------|-----|
| Familial diabetes                                                       | Endocrine disorders                        | 50  |
| Diabetes with additional phenotypes suggestive of a monogenic aetiology | Endocrine disorders                        | 46  |
| Disorders of sex development                                            | Endocrine disorders                        | 46  |
| Mitochondrial disorder with complex I deficiency                        | Endocrine disorders                        | 50  |
| Neonatal cholestasis                                                    | Gastroenterological disorders              | 69  |
| Infantile enterocolitis & monogenic inflammatory bowel disease          | Gastroenterological disorders              | 59  |
| Gastrointestinal epithelial barrier disorders                           | Gastroenterological disorders              | 54  |
| Cytopenias and congenital anaemias                                      | Haematological disorders                   | 121 |
| Cytopenia – NOT Fanconi anaemia                                         | Haematological disorders                   | 86  |
| Rare anaemia                                                            | Haematological disorders                   | 87  |
| Bleeding and platelet disorders                                         | Haematological disorders                   | 109 |
| Hearing loss                                                            | Hearing and ear disorders                  | 130 |
| Deafness and congenital structural abnormalities                        | Hearing and ear disorders                  | 46  |
| Undiagnosed metabolic disorders                                         | Metabolic disorders                        | 677 |
| Inborn errors of metabolism                                             | Metabolic disorders                        | 748 |
| Hyperammonaemia                                                         | Metabolic disorders                        | 48  |
| Lysosomal storage disorder                                              | Metabolic disorders                        | 51  |
| Mitochondrial disorder with complex IV deficiency                       | Metabolic disorders                        | 40  |
| Congenital disorders of glycosylation                                   | Metabolic disorders                        | 84  |
| Possible mitochondrial disorder – nuclear genes                         | Metabolic disorders                        | 311 |
| Mitochondrial disorders                                                 | Metabolic disorders                        | 306 |
| Arthrogryposis                                                          | Neurology and neurodevelopmental disorders | 141 |
| Genetic epilepsy syndromes                                              | Neurology and neurodevelopmental disorders | 575 |
| Malformations of cortical development                                   | Neurology and neurodevelopmental disorders | 68  |
| White matter disorders - adult onset                                    | Neurology and neurodevelopmental disorders | 77  |
| Structural basal ganglia disorders                                      | Neurology and neurodevelopmental disorders | 71  |
| Limb girdle muscular dystrophy                                          | Neurology and neurodevelopmental disorders | 168 |
| Hereditary spastic paraplegia -                                         | Neurology and neurodevelopmental disorders | 95  |



|                                                                  |                                            |      |
|------------------------------------------------------------------|--------------------------------------------|------|
| childhood onset                                                  |                                            |      |
| Hereditary spastic paraplegia - adult onset                      | Neurology and neurodevelopmental disorders | 94   |
| Hereditary spastic paraplegia                                    | Neurology and neurodevelopmental disorders | 84   |
| Congenital muscular dystrophy                                    | Neurology and neurodevelopmental disorders | 44   |
| Intellectual disability                                          | Neurology and neurodevelopmental disorders | 1653 |
| DDG2P                                                            | Neurology and neurodevelopmental disorders | 1673 |
| White matter disorders and cerebral calcification - narrow panel | Neurology and neurodevelopmental disorders | 141  |
| Inherited white matter disorders                                 | Neurology and neurodevelopmental disorders | 119  |
| Early onset dystonia                                             | Neurology and neurodevelopmental disorders | 58   |
| Adult onset movement disorder                                    | Neurology and neurodevelopmental disorders | 93   |
| Autism                                                           | Neurology and neurodevelopmental disorders | 86   |
| Hydrocephalus                                                    | Neurology and neurodevelopmental disorders | 84   |
| Hereditary ataxia - adult onset                                  | Neurology and neurodevelopmental disorders | 201  |
| Ataxia and cerebellar anomalies - narrow panel                   | Neurology and neurodevelopmental disorders | 170  |
| Hereditary ataxia                                                | Neurology and neurodevelopmental disorders | 139  |
| Congenital myopathy                                              | Neurology and neurodevelopmental disorders | 74   |
| Cerebellar hypoplasia                                            | Neurology and neurodevelopmental disorders | 54   |
| Hereditary neuropathy NOT PMP22 copy number                      | Neurology and neurodevelopmental disorders | 175  |
| Hereditary neuropathy                                            | Neurology and neurodevelopmental disorders | 186  |
| Neurodegenerative disorders - adult onset                        | Neurology and neurodevelopmental disorders | 144  |
| Childhood onset dystonia or chorea or related movement disorder  | Neurology and neurodevelopmental disorders | 204  |
| Rhabdomyolysis and metabolic muscle disorders                    | Neurology and neurodevelopmental disorders | 50   |
| Retinal disorders                                                | Ophtalmological disorders                  | 261  |
| Structural eye disease                                           | Ophtalmological disorders                  | 165  |
| Cataracts                                                        | Ophtalmological disorders                  | 102  |
| Kidneyome SuperPanel VCGS                                        | Renal and urinary tract disorders          | 320  |
| Unexplained paediatric onset end-stage renal disease             | Renal and urinary tract disorders          | 181  |
| Renal tubulopathies                                              | Renal and urinary tract disorders          | 46   |
| Unexplained kidney failure in young people                       | Renal and urinary tract disorders          | 84   |

|                                              |                                   |     |
|----------------------------------------------|-----------------------------------|-----|
| Proteinuric renal disease                    | Renal and urinary tract disorders | 49  |
| Skeletal dysplasia                           | Skeletal disorders                | 406 |
| Craniosynostosis                             | Skeletal disorders                | 63  |
| Limb disorders                               | Skeletal disorders                | 168 |
| Tumour predisposition - childhood onset      | Tumour syndromes                  | 94  |
| Haematological malignancies for rare disease | Tumour syndromes                  | 87  |
| Adult solid tumours for rare disease         | Tumour syndromes                  | 58  |
| Ehlers Danlos syndromes                      | Rheumatological disorders         | 53  |
| Growth failure in early childhood            | No family                         | 48  |
| Laterality disorders and isomerism           | No family                         | 43  |
| Primary immunodeficiency                     | No family                         | 306 |
| Rare genetic inflammatory skin disorders     | No family                         | 63  |

**Table S3:** List of gene prioritization tools used for comparative assessment.

| Name                                     | Strategy                               | Method                   | Aggregation Approach                           | Training Set            |
|------------------------------------------|----------------------------------------|--------------------------|------------------------------------------------|-------------------------|
| <b>GLOWgenes</b>                         | search for genes associated with seeds | Network Based            | Integration using ad-hoc network performance   | Whole-genome            |
| <b>Endeavour</b>                         | search for genes associated with seeds | Functional similarity    | Integration using order statistics             | Whole-genome            |
| <b>ToppGenet - functional similarity</b> | search for genes associated with seeds | Functional similarity    | Statistical meta-analysis (combined p-value)   | Neighbours in a network |
| <b>ToppGenet - network based</b>         | search for genes associated with seeds | Network Based            | Not applied                                    | Neighbours in a network |
| <b>NetComb - GUILDify</b>                | search for genes associated with seeds | Network Based            | Not applied                                    | Whole-genome            |
| <b>DIAMOnD</b>                           | search for genes associated with seeds | Network Based            | Not applied                                    | Whole-genome            |
| <b>GeneMANIA</b>                         | search for genes associated with seeds | Network Based            | Composite Functional Association Network       | Whole-genome            |
| <b>DisGeNET - non curated</b>            | pre-defined disease                    | Gene-disease association | Aggregated Score by number and type of sources | Whole-genome            |
| <b>DisGeNET - BEFREE</b>                 | pre-defined disease                    | Text-mining              | Aggregated Score by number of publications     | Whole-genome            |
| <b>DISEASES</b>                          | pre-defined disease                    | Text-mining              | Normalized number of abstracts                 | Whole-genome            |

**Table S4:** Type of evidence sources used by prioritization methods selected for benchmark.

|                        | GLOW genes | Endeavour | ToppGene t - func. similarity | ToppGene - network based | GUILDify | DIAMOnD | Gene MANIA | DisGeNET- non curated | DisGeNET-BEFREE | DISEASES |
|------------------------|------------|-----------|-------------------------------|--------------------------|----------|---------|------------|-----------------------|-----------------|----------|
| Literature             | x          | x         | x                             |                          |          |         |            | x                     | x               | x        |
| Expression             | x          | x         | x                             |                          |          |         | x          |                       |                 |          |
| Animal Models          | x          |           | x                             |                          |          |         |            | x                     |                 |          |
| PPI                    | x          | x         | x                             | x                        | x        | x       | x          |                       |                 |          |
| Functional Annotations | x          | x         | x                             |                          |          |         |            |                       |                 |          |
| Regulation             | x          | x         | x                             |                          |          |         |            |                       |                 |          |
| Genetic Associations   | x          | x         |                               |                          |          |         | x          | x                     |                 |          |
| Phenotype              | x          | x         | x                             |                          |          |         | x          | x                     |                 |          |
| Pathways               | x          | x         | x                             |                          |          |         | x          |                       |                 |          |
| Genomic Loc.           | x          |           |                               |                          |          |         |            |                       |                 |          |
| Complexes              | x          |           |                               |                          |          |         |            |                       |                 |          |
| Chemical information   | x          | x         |                               |                          |          |         |            |                       |                 |          |
| Localization           | x          | x         |                               |                          |          |         | x          |                       |                 |          |
| Sequence features      |            | x         |                               |                          |          |         | x          |                       |                 |          |
| Interologs             |            | x         |                               |                          |          |         | x          |                       |                 |          |

**Table S5.** Gene set used as virtual panel in the diagnosis of syndromic retinal dystrophies in the Fundacion Jimenez Diaz University Hospital.

ABCA5, ACACB, ACAD9, ACBD5, ADCY3, ALMS1, ANAPC16, AP3D1, AP5M1, AP5Z1, ARHGEF16, ARHGEF17, ARHGEF38, ARL2BP, ARL3, ASIC5, ATP1B2, BICDL2, BPHL, BUG22, C12orf29, c16orf80, CALHM3, CASKIN1, CASZ1, CCDC51, CCP110, CCP110, CEP128, CEP162, CEP164, CEP250, CEP83, CFAP20, CFAP20, CIC, CLUAP1, CNGA3, CNGB3, COBL, COL6A6, COQ8B, COX16, CPNE1, CRTAC1, CWC27, CYP1A1, DACT1, DHX32, DHX34, DIDO1, DMBX1, DMBX1, DPP3, DSCAML1, EDEM3, EFEMP1, EIF4G3, EML4, EP300, EPB41L4A, ERICH6, FAM135B, FAM13A, FAM208B, FAM57B, FBN2, FDFT1, FDXR, FLVCR1, FRMD7, FRMPD2, GMIP, GNB1, GNPTAB, GPR45, GRK1, GRN, GTL3, GUCA1C, HEATR5A, HECTD3, HK1, HSPA9, IFT140, IGSF1, INPP5E, IPO11, IRX1, IRX5, IRX5 - IRX6, IRX6, ITIH2, KCNC2, KCNQ5, KIAA0907, KIF3A, KIF3B, KIFAB3, KIRREL2, LAMA1, LAMB2, LAMC3, LAMP1, LARGE1, LCA5L, Locus arRP, Locus LCA, LTBP1, MAP7D2, MAPRE2, MCM7, METTL9, MFRP, MFSD8, MIGA1, MYO10, MYOM1, NDUFA12, NDUFS3, NUTMD2, NXF1, OTOGL, OTX3, PANK2, PARD3, PARD3B, PCDH15, PCDHGC3, PCM1, PCYT1A, PEX6, PKM, PLA2G5, PLXNB2, PLXNB3, POMGNT2, POMZP3, PPP1R21, PQLC2, PRDM13, PRDM13-IRX1, PREX2, PRPF4B, PRPS1, PTPRN2, PWWP2A, RAB5B, RANBP2, RASGRF2, RCBTB1, RDH12, RECQL4, RGS22, RGS7, RIMS2, RNU4ATAC, ROM1, RP1, RTTN, RUSC1, SAMD7, SAP30, SASS6, SCLT1, SF3B2, SGSH, SH3GL2, SHROOM2, SLC26A7, SLC37A3, SLC4A7, SLC6A6, SNX29, SON, SSBP1, SUFU, SYTL4, TBC1D32, TBC1D5, TCF20, TECPR2, TJP1,TKTL2, TMED7, TMEM87B, TNXB, TRAPPC14, TRPM2, UBAP1L, USH2A, USP15, USP16, VCAN, VPS13B, VPS13D, VSX2, XPNPEP2
